# Supplementary material for: Molecular Epidemiology of Mycobacterium abscessus Isolates Recovered from German Cystic Fibrosis Patients
Source: PubMed Central journal article supplement (PMC9431180; doi:10.1128/spectrum.01714-22), 2022-08-08
Supplement: spectrum.01714-22-s0001.pdf [file spectrum.01714-22-s0001.pdf]

## Supplementary material:

Table S1: Accession numbers, cluster, year of cultivation and country of isolation of included external isolates that were used for phylogenetic comparison with the German isolates.

| Analysis id | Run accession | Sample accession | Cluster     | Subspecies | Year | Country        |
|-------------|---------------|------------------|-------------|------------|------|----------------|
| ERZ371284   | ERR459789     | SAMEA2259579     | 1abss       | mabs       | 2002 | Australia      |
| ERZ371551   | ERR343217     | SAMEA2068964     | 1abss       | mabs       | 2009 | United Kingdom |
| ERZ371675   | ERR494842     | SAMEA2275703     | 1abss       | mabs       | 2010 | United Kingdom |
| ERZ371789   | ERR459826     | SAMEA2259620     | 1abss       | mabs       | 2011 | Australia      |
| ERZ371867   | ERR340567     | SAMEA2071624     | 1abss       | mabs       | 2012 | United Kingdom |
| ERZ371914   | ERR459822     | SAMEA2259616     | 1abss       | mabs       | 2012 | Australia      |
| ERZ371993   | ERR494937     | SAMEA2275808     | 1abss       | mabs       | 2012 | United Kingdom |
| ERZ372031   | ERR484996     | SAMEA2275872     | 1abss       | mabs       | 2013 | United Kingdom |
| ERZ372111   | ERR340556     | SAMEA2071620     | 1abss       | mabs       | 2015 | United Kingdom |
| ERZ372266   | ERR373959     | SAMEA2142635     | 1abss       | mabs       | 2015 | USA            |
| ERZ371238   | ERR337803     | SAMEA1967286     | 2abss       | mabs       | 2001 | United Kingdom |
| ERZ371605   | ERR343230     | SAMEA2068970     | 2abss       | mabs       | 2010 | United Kingdom |
| ERZ371621   | ERR351976     | SAMEA2070786     | 2abss       | mabs       | 2010 | United Kingdom |
| ERZ371868   | ERR340568     | SAMEA2068740     | 2abss       | mabs       | 2012 | United Kingdom |
| ERZ371996   | ERR494940     | SAMEA2275811     | 2abss       | mabs       | 2012 | United Kingdom |
| ERZ372021   | ERR484951     | SAMEA2275880     | 2abss       | mabs       | 2013 | United Kingdom |
| ERZ372038   | ERR485003     | SAMEA2275881     | 2abss       | mabs       | 2013 | United Kingdom |
| ERZ372228   | ERR369141     | SAMEA2149411     | 2abss       | mabs       | 2015 | Denmark        |
| ERZ372262   | ERR373955     | SAMEA2148059     | 2abss       | mabs       | 2015 | USA            |
| ERZ372329   | ERR374019     | SAMEA2150987     | 2abss       | mabs       | 2015 | USA            |
| ERZ371269   | ERR459771     | SAMEA2259560     | 1mass       | mmas       | 2001 | Australia      |
| ERZ371379   | ERR337839     | SAMEA2070653     | 1mass       | mmas       | 2005 | United Kingdom |
| ERZ371422   | ERR337869     | SAMEA2070662     | 1mass       | mmas       | 2006 | United Kingdom |
| ERZ371592   | ERR490687     | SAMEA2275670     | 1mass       | mmas       | 2009 | United Kingdom |
| ERZ371697   | ERR340517     | SAMEA2071556     | 1mass       | mmas       | 2011 | United Kingdom |
| ERZ372013   | ERR459928     | SAMEA2259648     | 1mass       | mmas       | 2013 | Australia      |
| ERZ371806   | ERR473276     | SAMEA2275636     | 1mass       | mmas       | 2011 | United Kingdom |
| ERZ372231   | ERR369144     | SAMEA2163411     | 1mass       | mmas       | 2015 | Denmark        |
| ERZ372253   | ERR337820     | SAMEA2071357     | 1mass       | mmas       | 2015 | United Kingdom |
| ERZ372365   | ERR473269     | SAMEA2275629     | 1mass       | mmas       | 2015 | United Kingdom |
| ERZ371470   | ERR459959     | SAMEA2259686     | unclustered | mabs       | 2007 | Australia      |
| ERZ371661   | ERR490697     | SAMEA2275687     | unclustered | mabs       | 2010 | United Kingdom |
| ERZ371791   | ERR459832     | SAMEA2259631     | unclustered | mmas       | 2011 | Australia      |
| ERZ371895   | ERR337770     | SAMEA2071240     | unclustered | mmas       | 2012 | United Kingdom |
| ERZ372018   | ERR484948     | SAMEA2275870     | unclustered | mabs       | 2013 | United Kingdom |
| ERZ372160   | ERR330835     | SAMEA2071201     | unclustered | mabs       | 2015 | Ireland        |
| ERZ372248   | ERR330874     | SAMEA2070535     | unclustered | mabs       | 2015 | United Kingdom |
| ERZ372295   | ERR373986     | SAMEA2156366     | unclustered | mabs       | 2015 | USA            |
| ERZ371240   | ERR337811     | SAMEA2070829     | unclustered | mabs       | 2001 | United Kingdom |
| ERZ371441   | ERR459926     | SAMEA2259645     | unclustered | mmas       | 2006 | Australia      |
| ERZ371714   | ERR340496     | SAMEA2071549     | unclustered | mabs       | 2011 | United Kingdom |
| ERZ371875   | ERR330781     | SAMEA2071184     | unclustered | mabs       | 2012 | United Kingdom |
| ERZ372042   | ERR494979     | SAMEA2275869     | unclustered | mabs       | 2013 | United Kingdom |

|           |           |              |             |      |      |                |
|-----------|-----------|--------------|-------------|------|------|----------------|
| ERZ372205 | ERR363442 | SAMEA2150176 | unclustered | mmas | 2015 | Denmark        |
| ERZ372288 | ERR373979 | SAMEA2155514 | unclustered | mmas | 2015 | USA            |
| ERZ372294 | ERR373985 | SAMEA2145943 | unclustered | mmas | 2015 | USA            |
| ERZ372257 | ERR373942 | SAMEA2143632 | unclustered | mmas | 2015 | Denmark        |
| ERZ372157 | ERR330756 | SAMEA2070588 | unclustered | mmas | 2015 | United Kingdom |
| ERZ372128 | ERR349279 | SAMEA2156007 | unclustered | mmas | 2015 | USA            |
| ERZ372029 | ERR484993 | SAMEA2275866 | unclustered | mmas | 2013 | United Kingdom |
| ERZ371837 | ERR494869 | SAMEA2275734 | 1boll       | mbol | 2011 | United Kingdom |
| ERZ372214 | ERR363457 | SAMEA2150262 | 1boll       | mbol | 2015 | Denmark        |
| ERZ372223 | ERR369136 | SAMEA2147405 | 1boll       | mbol | 2015 | Denmark        |
| ERZ372236 | ERR369149 | SAMEA1971359 | 1boll       | mbol | 2015 | Denmark        |
| IF2*      | NA        | NA           | 1boll       | mbol | 2003 | Italy          |
| ERZ371667 | ERR490703 | SAMEA2275694 | unclustered | mbol | 2010 | United Kingdom |
| ERZ371704 | ERR340523 | SAMEA2071558 | unclustered | mbol | 2011 | United Kingdom |
| ERZ371737 | ERR330787 | SAMEA2071186 | unclustered | mbol | 2011 | United Kingdom |
| ERZ371881 | ERR337753 | SAMEA2070302 | unclustered | mbol | 2012 | United Kingdom |
| ERZ371967 | ERR494914 | SAMEA2275782 | unclustered | mbol | 2012 | United Kingdom |
| ERZ372010 | ERR363451 | SAMEA1966577 | unclustered | mbol | 2013 | United Kingdom |
| ERZ372100 | ERR340545 | SAMEA2070907 | unclustered | mbol | 2015 | United Kingdom |
| ERZ372212 | ERR363455 | SAMEA2160080 | unclustered | mbol | 2015 | Denmark        |
| ERZ372221 | ERR369134 | SAMEA2153565 | unclustered | mbol | 2015 | Denmark        |
| ERZ372224 | ERR369137 | SAMEA2149450 | unclustered | mbol | 2015 | Denmark        |

mabs – *M. abscessus* subsp. *abscessus*; mmas – *M. abscessus* subsp. *massiliense*; mbol – *M. abscessus* subsp. *bolletii*.

\*From internal database at research center Borstel. Tortoli et al. Mycobacterium abscessus in patients with cystic fibrosis: Low impact of inter-human transmission in Italy. European Respiratory Journal. European Respiratory Society. <https://doi.org/10.1183/13993003.02525-2016>

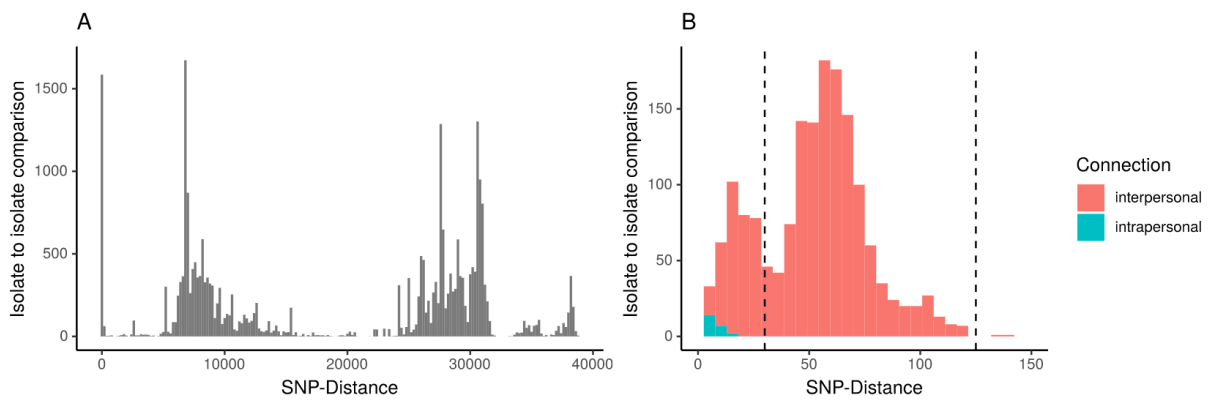

Figure S1: SNP-distance distribution for all isolate-to-isolate comparisons in this study (A) and zoom-in for closely related isolates (B). Vertical dashed lines mark our thresholds of 25 and 125 SNPs.
